# Supplementary material for: Preparation of chitosan/retinoic acid @ nanocapsules/TiO2 self-cleaning one-dimensional photonic crystals and the study of the visual detection of acute promyelocytic leukemia
Source: Royal Society of Chemistry journal article supplement (doi:10.1039/d3ra02224b), 2023-01-01
Supplement: d3ra02224b1.pdf [file d3ra02224b1.pdf]

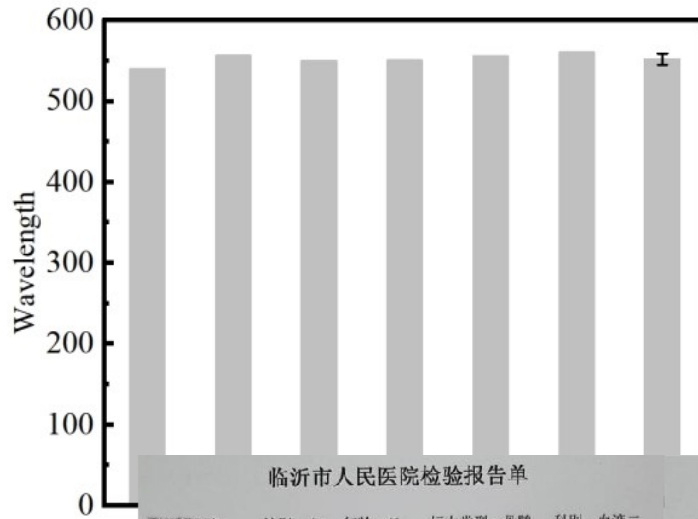

Figure S1 Rep

| 临沂市人民医院检验报告单                                                                                                                                                                                                          |                                                                                                                              |    |
|-----------------------------------------------------------------------------------------------------------------------------------------------------------------------------------------------------------------------|------------------------------------------------------------------------------------------------------------------------------|----|
| 姓名: [REDACTED] 性别: 女 年龄: 43 标本类型: 骨髓 科别: 血液二<br>床号: 34 床 临床诊断: 全血细胞减少                                                                                                                                                 |                                                                                                                              |    |
| 检测仪器: BD CANTO (十色)<br>抗体生产厂家: BD<br>细胞获取数量: 100000 个<br>获取参数: FSC-lin, SSC-log, FL1-F6 Log, FL8-F9 Log<br>结果分析: CD45SSC 设门法                                                                                          |                                                                                                                              |    |
| 项目抗体: CD45(4) CD33(1) CD117(1) CD34(2) CD56(1) HLA-DR(1) CD38(2) CD15(1) CD64(1) CD123(1) CD13(1) CD118(1) CD14(1) CD15(1) CD19(1) CD22(1) CD5(1) CD19(1) CD20(1) CD2(1) CD-(1) CD3(2) CD8(1) CD7(1) MPO(1) cCD79a(1) |                                                                                                                              |    |
| 检测项目:                                                                                                                                                                                                                 | 白血病免疫分型                                                                                                                      |    |
| 检测结果:                                                                                                                                                                                                                 |                                                                                                                              |    |
| 中文名称:                                                                                                                                                                                                                 | 结果                                                                                                                           | 单位 |
| 异常细胞群 (Q 群)                                                                                                                                                                                                           | 84.64                                                                                                                        | %  |
| 占有核细胞                                                                                                                                                                                                                 |                                                                                                                              |    |
| 表达                                                                                                                                                                                                                    | CD117part+, CD15, CD33, CD38dim, CD64, CD123, MPO                                                                            |    |
| 不表达                                                                                                                                                                                                                   | CD34, CD56, HLA-DR, CD16, CD11b, CD14, CD7, CD15, CD16, CD22, CD5, CD19, CD20, CD2, CD4, CD3, CD8, cCD79a, cCD3, 为异常髓系幼稚细胞表型 |    |
| 结论:                                                                                                                                                                                                                   | 急性髓系白血病(AML-M3)                                                                                                              |    |
| 结果解释:                                                                                                                                                                                                                 | 骨髓中异常髓系幼稚细胞比例明显增高, 占有核细胞 84.64%, 表型如上, 符合 AML-M3 表型, 请结合形态学、染色体及 PML-RARa 融合基因检查。                                            |    |

| 临沂市人民医院检验报告单                                                                                                                                                                                                           |                                                                                                                 |  |
|------------------------------------------------------------------------------------------------------------------------------------------------------------------------------------------------------------------------|-----------------------------------------------------------------------------------------------------------------|--|
| 姓名: [REDACTED] 性别: 男 年龄: 49 标本类型: 骨髓 科别: 血液二<br>床号: 1 床 临床诊断: APL                                                                                                                                                      |                                                                                                                 |  |
| 检测仪器: BD CANTO (十色)<br>抗体生产厂家: BD<br>细胞获取数量: 50000 个<br>获取参数: FSC-lin, SSC-log, FL1-F6 Log, FL8-F9 Log<br>结果分析: CD45SSC 设门法                                                                                            |                                                                                                                 |  |
| 项目抗体: CD45(4) CD33(1) CD33(1) CD117(1) CD34(2) CD56(1) HLA-DR(1) CD38(2) CD15(1) CD64(1) CD123(1) CD13(1) CD118(1) CD14(1) CD15(1) CD19(1) CD22(1) CD5(1) CD19(1) CD20(1) CD2(1) CD3(1) CD8(1) CD7(1) MPO(1) cCD79a(1) |                                                                                                                 |  |
| 检测项目:                                                                                                                                                                                                                  | 白血病免疫分型                                                                                                         |  |
| 检测结果:                                                                                                                                                                                                                  |                                                                                                                 |  |
| 中文名称:                                                                                                                                                                                                                  | 结果                                                                                                              |  |
| 异常细胞群 (P5)                                                                                                                                                                                                             | 90.3                                                                                                            |  |
| 占有核细胞                                                                                                                                                                                                                  |                                                                                                                 |  |
| 表达                                                                                                                                                                                                                     | CD117, CD13, CD33, CD38, CD64, CD123, MPO                                                                       |  |
| 不表达                                                                                                                                                                                                                    | CD36, CD34, CD56, HLA-DR, CD16, CD11b, CD14, CD15, CD10, CD22, CD5, CD19, CD20, CD2, CD4, CD3, CD8, CD7, cCD79a |  |
| 结论:                                                                                                                                                                                                                    | 符合急性髓系白血病(AML-M3)免疫表型                                                                                           |  |
| 结果解释:                                                                                                                                                                                                                  | 骨髓中异常髓系幼稚细胞比例明显增高, 占有核细胞 90.3%, 形态学及 PML-RARa 融合基因检查。                                                           |  |

| 临沂市人民医院检验报告单                                                                                                                                                                                                          |                                                                                                                  |    |
|-----------------------------------------------------------------------------------------------------------------------------------------------------------------------------------------------------------------------|------------------------------------------------------------------------------------------------------------------|----|
| 姓名: [REDACTED] 性别: 男 年龄: 15 标本类型: 外周血 科别: 血液三<br>床号: 2 床 临床诊断: APL                                                                                                                                                    |                                                                                                                  |    |
| 检测仪器: BD CANTO (十色)<br>抗体生产厂家: BD<br>细胞获取数量: 100000 个<br>获取参数: FSC-lin, SSC-log, FL1-F6 Log, FL8-F9 Log<br>结果分析: CD45SSC 设门法                                                                                          |                                                                                                                  |    |
| 项目抗体: CD45(4) CD33(1) CD117(1) CD34(2) CD56(1) HLA-DR(1) CD38(2) CD15(1) CD64(1) CD123(1) CD13(1) CD118(1) CD14(1) CD15(1) CD19(1) CD22(1) CD5(1) CD19(1) CD20(1) CD2(1) CD4(1) CD3(2) CD8(1) CD7(1) MPO(1) cCD79a(1) |                                                                                                                  |    |
| 检测项目:                                                                                                                                                                                                                 | 白血病免疫分型                                                                                                          |    |
| 检测结果:                                                                                                                                                                                                                 |                                                                                                                  |    |
| 中文名称:                                                                                                                                                                                                                 | 结果                                                                                                               | 单位 |
| 异常细胞群 (L)                                                                                                                                                                                                             | 51.34                                                                                                            | %  |
| 占有核细胞                                                                                                                                                                                                                 |                                                                                                                  |    |
| 表达                                                                                                                                                                                                                    | CD117, CD13, CD33, CD38dim, CD123, MPO                                                                           |    |
| 部分表达                                                                                                                                                                                                                  | CD34, CD56                                                                                                       |    |
| 不表达                                                                                                                                                                                                                   | HLA-DR, CD16, CD11b, CD14, CD15, CD10, CD22, CD5, CD19, CD20, CD2, CD4, CD3, CD8, CD7, cCD79a, cCD3, 为异常髓系幼稚细胞表型 |    |
| 结论:                                                                                                                                                                                                                   | 急性髓系白血病(AML-M3)                                                                                                  |    |
| 结果解释:                                                                                                                                                                                                                 | 标本中异常髓系幼稚细胞比例明显增高, 占有核细胞 51.34%, 表型如上, 符合急性髓系白血病(AML-M3)表型, 请结合形态学、染色体及 PML-RARa 融合基因检查。                         |    |

| 临沂市人民医院检验报告单                                                                                                                                                                                                   |                                                                                                                              |  |
|----------------------------------------------------------------------------------------------------------------------------------------------------------------------------------------------------------------|------------------------------------------------------------------------------------------------------------------------------|--|
| 姓名: [REDACTED] 性别: 男 年龄: 70 标本类型: 骨髓 科别: 血液二<br>床号: 24 床 临床诊断: APL                                                                                                                                             |                                                                                                                              |  |
| 检测仪器: BD CANTO (十色)<br>抗体生产厂家: BD<br>细胞获取数量: 100000 个<br>获取参数: FSC-lin, SSC-log, FL1-F6 Log, FL8-F9 Log<br>结果分析: CD45SSC 设门法                                                                                   |                                                                                                                              |  |
| 项目抗体: CD45(4) CD33(1) CD117(1) CD34(2) CD56(1) HLA-DR(1) CD38(2) CD15(1) CD64(1) CD123(1) CD13(1) CD118(1) CD14(1) CD15(1) CD19(1) CD22(1) CD5(1) CD19(1) CD20(1) CD2(1) CD3(1) CD8(1) CD7(1) MPO(1) cCD79a(1) |                                                                                                                              |  |
| 检测项目:                                                                                                                                                                                                          | 白血病免疫分型                                                                                                                      |  |
| 检测结果:                                                                                                                                                                                                          |                                                                                                                              |  |
| 中文名称:                                                                                                                                                                                                          | 结果                                                                                                                           |  |
| 异常细胞群 (G)                                                                                                                                                                                                      | 89.40                                                                                                                        |  |
| 占有核细胞                                                                                                                                                                                                          |                                                                                                                              |  |
| 表达                                                                                                                                                                                                             | CD117, CD13, CD33, CD64, CD123, CD15, MPO                                                                                    |  |
| 部分表达                                                                                                                                                                                                           | CD38                                                                                                                         |  |
| 不表达                                                                                                                                                                                                            | CD34, CD56, HLA-DR, CD16, CD11b, CD14, CD15, CD10, CD22, CD5, CD19, CD20, CD2, CD4, CD3, CD8, CD7, cCD79a, cCD3, 为异常髓系幼稚细胞表型 |  |
| 结论:                                                                                                                                                                                                            | 急性髓系白血病(AML-M3)                                                                                                              |  |
| 结果解释:                                                                                                                                                                                                          | 骨髓中异常髓系幼稚细胞比例明显增高, 占有核细胞 89.40%, 如上, 符合 AML-M3 表型, 请结合形态学、染色体及 PML-RARa 融合基因检查。                                              |  |

| 临沂市人民医院检验报告单                                                                                                                                                                                                          |                                                                                                                        |    |
|-----------------------------------------------------------------------------------------------------------------------------------------------------------------------------------------------------------------------|------------------------------------------------------------------------------------------------------------------------|----|
| 姓名: [REDACTED] 性别: 男 年龄: 54 标本类型: 骨髓 科别: 血液三<br>床号: 28 床 临床诊断: 全血细胞减少                                                                                                                                                 |                                                                                                                        |    |
| 检测仪器: BD CANTO (十色)<br>抗体生产厂家: BD<br>细胞获取数量: 100000 个<br>获取参数: FSC-lin, SSC-log, FL1-F6 Log, FL8-F9 Log<br>结果分析: CD45SSC 设门法                                                                                          |                                                                                                                        |    |
| 项目抗体: CD45(4) CD33(1) CD117(1) CD34(2) CD56(1) HLA-DR(1) CD38(2) CD15(1) CD64(1) CD123(1) CD13(1) CD118(1) CD14(1) CD15(1) CD19(1) CD22(1) CD5(1) CD19(1) CD20(1) CD2(1) CD4(1) CD3(1) CD8(1) CD7(1) MPO(1) cCD79a(1) |                                                                                                                        |    |
| 检测项目:                                                                                                                                                                                                                 | 白血病免疫分型                                                                                                                |    |
| 检测结果:                                                                                                                                                                                                                 |                                                                                                                        |    |
| 中文名称:                                                                                                                                                                                                                 | 结果                                                                                                                     | 单位 |
| 异常细胞群 (M)                                                                                                                                                                                                             | 78.02                                                                                                                  | %  |
| 占有核细胞                                                                                                                                                                                                                 |                                                                                                                        |    |
| 表达                                                                                                                                                                                                                    | CD33, CD117, CD13, CD64, CD38, MPO                                                                                     |    |
| 部分表达                                                                                                                                                                                                                  | CD15, CD123                                                                                                            |    |
| 不表达                                                                                                                                                                                                                   | CD16, CD10, CD22, CD5, CD19, CD20, CD2, CD3, CD8, CD7, cCD79a, cCD3, CD14, CD4, CD11b, CD34, HLA-DR, CD56, 为异常髓系幼稚细胞表型 |    |
| 结论:                                                                                                                                                                                                                   | 急性髓系白血病(AML-M3)                                                                                                        |    |

| 临沂市人民医院检验报告单                                                                                                                                                                                                           |                                                                                                                        |  |
|------------------------------------------------------------------------------------------------------------------------------------------------------------------------------------------------------------------------|------------------------------------------------------------------------------------------------------------------------|--|
| 姓名: [REDACTED] 性别: 女 年龄: 50 标本类型: 骨髓 科别: 血液二<br>床号: 32 床 临床诊断: APL                                                                                                                                                     |                                                                                                                        |  |
| 检测仪器: BD CANTO (十色)<br>抗体生产厂家: BD<br>细胞获取数量: 100000 个<br>获取参数: FSC-lin, SSC-log, FL1-F6 Log, FL8-F9 Log<br>结果分析: CD45SSC 设门法                                                                                           |                                                                                                                        |  |
| 项目抗体: CD45(4) CD33(1) CD33(1) CD117(1) CD34(2) CD56(1) HLA-DR(1) CD38(2) CD15(1) CD64(1) CD123(1) CD13(1) CD118(1) CD14(1) CD15(1) CD19(1) CD22(1) CD5(1) CD19(1) CD20(1) CD2(1) CD3(1) CD8(1) CD7(1) MPO(1) cCD79a(1) |                                                                                                                        |  |
| 检测项目:                                                                                                                                                                                                                  | 白血病免疫分型                                                                                                                |  |
| 检测结果:                                                                                                                                                                                                                  |                                                                                                                        |  |
| 中文名称:                                                                                                                                                                                                                  | 结果                                                                                                                     |  |
| 异常细胞群 (G)                                                                                                                                                                                                              | 90.07                                                                                                                  |  |
| 占有核细胞                                                                                                                                                                                                                  |                                                                                                                        |  |
| 表达                                                                                                                                                                                                                     | CD13, CD33, CD64, CD123, MPO                                                                                           |  |
| 部分表达                                                                                                                                                                                                                   | CD117, CD34, CD56                                                                                                      |  |
| 不表达                                                                                                                                                                                                                    | HLA-DR, CD16, CD11b, CD14, CD38, CD15, CD10, CD22, CD5, CD19, CD20, CD2, CD4, CD3, CD8, CD7, cCD79a, cCD3, 为异常髓系幼稚细胞表型 |  |
| 结论:                                                                                                                                                                                                                    | 急性髓系白血病(AML-M3)                                                                                                        |  |
| 结果解释:                                                                                                                                                                                                                  | 骨髓中异常髓系幼稚细胞比例明显增高, 占有核细胞 90.07%                                                                                        |  |

FigureS2 Provide clinical diagnosis reports of patients with blood samples.
